# Supplementary material for: Platinum‐ and CuOx‐Decorated TiO2 Photocatalyst for Oxidative Coupling of Methane to C2 Hydrocarbons in a Flow Reactor
Source: PubMed Central journal article supplement (PMC7689917; doi:10.1002/anie.202007557), 2020-07-16
Supplement: ANIE-59-19702-s001.pdf [file ANIE-59-19702-s001.pdf]

Supporting Information

**Platinum- and CuO<sub>x</sub>-Decorated TiO<sub>2</sub> Photocatalyst for Oxidative Coupling of Methane to C<sub>2</sub> Hydrocarbons in a Flow Reactor**

*Xiyi Li, Jijia Xie, Heng Rao, Chao Wang, and Junwang Tang\**

anie\_202007557\_sm\_miscellaneous\_information.pdf

Supporting Information  
©Wiley-VCH 2019  
69451 Weinheim, Germany

**Table of Contents**

|                                                                         |    |
|-------------------------------------------------------------------------|----|
| Experimental Procedures .....                                           | 3  |
| The diagram of the reactor .....                                        | 5  |
| Additional characterizations .....                                      | 6  |
| Control experiments .....                                               | 10 |
| Comparison of the performance of photocatalytic methane conversion..... | 11 |
| Reference .....                                                         | 12 |

## SUPPORTING INFORMATION

**Experimental Procedures**

**Synthesis of  $\text{Cu}_x/\text{PC-50}$ :** Cu was introduced by a wet impregnation method. In a typical experiment, different concentration of  $\text{Cu}(\text{NO}_3)_2 \cdot 2.5\text{H}_2\text{O}$  (98%, Alfa Aesar) dissolved in 150  $\mu\text{L}$  deionized (DI) water was added to 200 mg of  $\text{TiO}_2$  (Millennium PC-50) under vigorous stirring in an alumina crucible. After drying at 70  $^\circ\text{C}$  for 3 h, the crucible was equipped with a lid and transferred to a muffle furnace (Carbolite, CWF 1300). The mixture was calcined at 400  $^\circ\text{C}$  for 4 h with a heating rate of 5  $^\circ\text{C}/\text{min}$ . The samples synthesized by this impregnation method was denoted as  $\text{Cu}_x/\text{PC-50}$  ( $x = 0.05, 0.1, 0.2, 0.3, 0.4$  wt.%, corresponding to the loading weight percentage of Cu at  $\text{TiO}_2$ ).

**Synthesis of  $\text{Pt}_{0.5}/\text{PC-50}$ :** Pt was introduced by a photodeposition method. Typically, 250 mg  $\text{TiO}_2$  was dispersed into a solution of 27 mL DI water and 3 mL methanol. Then, 0.5 wt.% (the weight percentage of Pt to  $\text{TiO}_2$ ) of  $\text{H}_2\text{PtCl}_6$  (99.995%, Sigma-Aldrich) was added to the above solution and allowed to be bubbled with argon (99.999%, BOC) for 20 minutes. Afterwards, the suspension was stirred under irradiation with a Multichannel 365 nm LED (Perfect Light, Beijing) at 25  $^\circ\text{C}$  for 3h. The samples were collected by centrifugation, washed with DI water for three times and dried at 70  $^\circ\text{C}$  for 6 h.

**Synthesis of  $\text{Cu}_{0.1}\text{Pt}_y/\text{PC-50}$ :** Pt was introduced by photodeposition method and then Cu was incorporated by wet impregnation method. Typically, 250 mg  $\text{TiO}_2$  was dispersed into a solution of 27 mL DI water and 3 mL methanol. Then, a different amount (0.1~2.0 wt. %, the weight percentage of Pt to  $\text{TiO}_2$ ) of  $\text{H}_2\text{PtCl}_6$  was added to the above solution and allowed to be bubbled with argon for 20 minutes. Afterwards, the suspension was stirred under irradiation with a Multichannel 365 nm LED at 25  $^\circ\text{C}$  for 3h. The samples were collected by centrifugation, washed with DI water for three times and dried at 70  $^\circ\text{C}$  for 6 h. The samples obtained here were denoted as  $\text{Pt}_y/\text{PC-50-unheating}$  ( $y = 0.1, 0.5, 1.0, 1.5, 2.0$ ). The following deposition of Cu was similar to the procedure mentioned in the preparation of  $\text{Cu}_x/\text{PC-50}$ , except the change of precursor from PC-50 to  $\text{Pt}_y/\text{PC-50}$  ( $y = 0.1, 0.5, 1.0, 1.5, 2.0$ ).

**Synthesis of  $\text{Pt}_{0.5}\text{Cu}_{0.1}/\text{PC-50}$ :** The synthesis of  $\text{Pt}_{0.5}\text{Cu}_{0.1}/\text{PC-50}$  was similar to the synthesis of  $\text{Cu}_{0.1}\text{Pt}_{0.5}/\text{PC-50}$  just changing the order of two components preparation.

**Heating treatment:** In order to maintain the consistent experimental condition,  $\text{Pt}_{0.5}/\text{PC-50-unheating}$  and  $\text{TiO}_2$  were also heated at muffle furnace with the program used in the preparation of  $\text{Cu}_x/\text{PC-50}$ . They were denoted as  $\text{Pt}_{0.5}/\text{PC-50}$  and PC-50, respectively in the following section without special note.

**Material Characterization:** The powder X-ray diffraction (XRD) patterns were measured in a Stoe STADI-P instrument ( $2^\circ$  to  $40^\circ$ , step 0.5  $^\circ$  at 5.0 s/step) using Mo  $\text{K}\alpha 1$  (wavelength 0.70930  $\text{\AA}$ , 50 kV and 30 mA). Ultraviolet-visible diffuse reflectance spectroscopy (UV-Vis DRS) measurements were conducted by an Agilent Carry 3500 UV-Vis-NIR spectrophotometer with a diffuse reflectance unit. Raman spectroscopy was conducted at Renishaw InVia Raman with 514 nm excitation laser, ranging from 100 – 1200  $\text{cm}^{-1}$ . X-ray photoelectron spectroscopy (XPS) measurements were performed using a Thermoscientific XPS K-alpha and the obtained results were analyzed by Casa XPS software. A JEOL JSM-7401F SEM equipped with Energy Dispersive-X-Ray (EDX) was applied to analyze the micro-morphology and composition

## SUPPORTING INFORMATION

information of the materials on carbon tips. The transmission electron microscopy (TEM) images, high-resolution transmission electron microscopy (HRTEM) images were obtained using a JEOL 2010 instrument. Photoluminescence (PL) spectra were collected by Renishaw InVia Raman with 325 nm excitation laser ranging from 200 – 800 nm. Electron paramagnetic resonance (EPR) was measured by a MS-5000 spectrometer at ambient temperature (288 K). Powder samples (~30 mg) were weighed in quartz tubes and sealed with septa. Microwave power was set at 100 microwatts, while the frequency was 9.485 GHz. A 365 nm LED (80 mW cm<sup>-2</sup>) was applied for the experiment under irradiation.

**Photo-electrochemical test:** The electrode was prepared by dispersion of viscous pastes of pristine TiO<sub>2</sub> or modified TiO<sub>2</sub> onto fluorine doped tin oxide (FTO). Typically, 30 mg TiO<sub>2</sub> or modified TiO<sub>2</sub>, 60 mg of ethyl cellulose, 6 drops of terpineol and 1 ml ethanol were mixed together and ground for 10 minutes to prepare pastes. The coating process was kept at 70 °C to improve their adhesion. The total exposed area of the film was 1.0 cm<sup>2</sup>. The transient photocurrent response was investigated over a three-electrode electrolytic cell with an electrochemical workstation (IVIUM). The FTO electrode with catalysts was installed as a working electrode, the Pt plate as the counter electrode and Ag/AgCl electrode was applied as the reference electrode in 0.1 M Na<sub>2</sub>SO<sub>4</sub> electrolyte. The light source was provided by a 150 W Xenon lamp with 1.5 AM filter and the switching period was set as 3 s.

**Photocatalytic activity tests:** The photocatalytic activity of the as-synthesized samples toward methane conversion was investigated in a flow reactor (Figure S1) connected with a GC. Typically, 100 mg photocatalyst was weighed and dispersed in 50 mL de-ionised water. The suspension was allowed to be sonicated for 15 minutes. Then, the suspension was filtered with a glass fibre membrane (diameter 37 mm, pore size 0.22 µm) to produce a uniform film, which was dried at 70 °C for 12 hours. After drying, the film was fixed in the reactor using a stainless ring and sealed with a rubber O-ring. A temperature probe was inserted from the bottom of the reactor in order to monitor the temperature of the reaction. The flow rate and ratio of different gases (air, methane, argon, BOC 99.999%) were adjusted by three mass flow controller (MFC, Bronkhorst). The film was then irradiated by 365 nm light by a 40 W LED (Beijing Perfect Light, PLS-LED 100). For each experiment, the system was allowed to purge with gases at an expected ratio to reach the equilibrium of adsorption-desorption before testing. The outlet gases were detected by an Agilent 7820 GC equipped with an online injection valve at regular time intervals (30 minutes). In this GC, two columns (CarbonPlot and Molecular 5A) are connected with thermal conductivity detectors (TCD) to analyze H<sub>2</sub>, O<sub>2</sub>, N<sub>2</sub>, CH<sub>4</sub>, respectively. Another column (HP-PLOT Q) is linked with flame ionization detectors (FID) to analyze organic products, such as C<sub>2</sub>H<sub>4</sub>, C<sub>2</sub>H<sub>6</sub>, CH<sub>3</sub>OH, C<sub>2</sub>H<sub>5</sub>OH, respectively. The outlet was also connected to another GC (Varian 450) by a long tube. A FID equipped with methanizer in this GC was used to quantify the concentration of CO<sub>2</sub> and CO.

**Calculation of selectivity:** The main products were C<sub>2</sub>H<sub>6</sub>, C<sub>2</sub>H<sub>4</sub>, CO<sub>2</sub> and a tiny amount of other products. Thus, the selectivity for C<sub>2</sub> products were calculated as below:

$$\text{Selectivity\%} = 100\% \times 2 \times \text{total moles of C}_2\text{H}_6 \text{ and C}_2\text{H}_4 / (2 \times \text{total moles of C}_2\text{H}_6 \text{ and C}_2\text{H}_4 + \text{obtained moles of CO}_2)$$

**Calculation of apparent quantum efficiency (AQE) based on the conversion of methane:**

$$\text{AQE} = \frac{2 \times \text{number of C}_2\text{H}_6 \text{ molecules} + 4 \times \text{number of C}_2\text{H}_4 \text{ molecules} + 8 \times \text{number of CO}_2 \text{ molecules}}{\text{Number of incident photons}} \times 100\%$$

The irradiation area is 10 cm<sup>2</sup>; The light intensity of 40 W 365 nm LED is 160 mW cm<sup>-2</sup>.

## SUPPORTING INFORMATION

## The diagram of the reactor

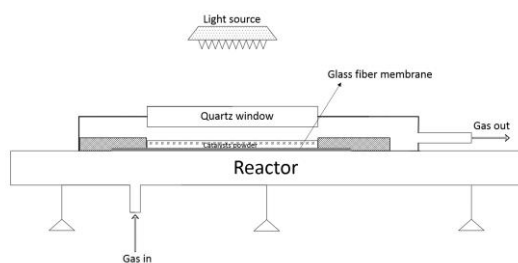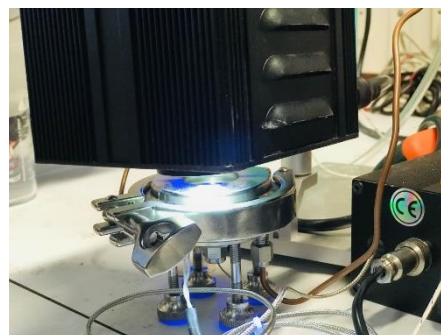

**Figure S1.** The flow reactor for photocatalytic OCM reaction

The house-design gastight flow reactor used in this study was made from stainless-steel equipped with a quartz window on its top made by Beijing Perfect Light Ltd. The catalyst film was fixed by a stainless-steel ring at the middle high of the reactor. A **thermo sensor** was inserted at the bottom the reactor bed to monitor the reaction temperature. Mixed reactant gas flowed into the reactor at the bottom of reactor, then through the catalyst bed and finally flowed into a GC for products analysis.

## SUPPORTING INFORMATION

## Additional Characterizations

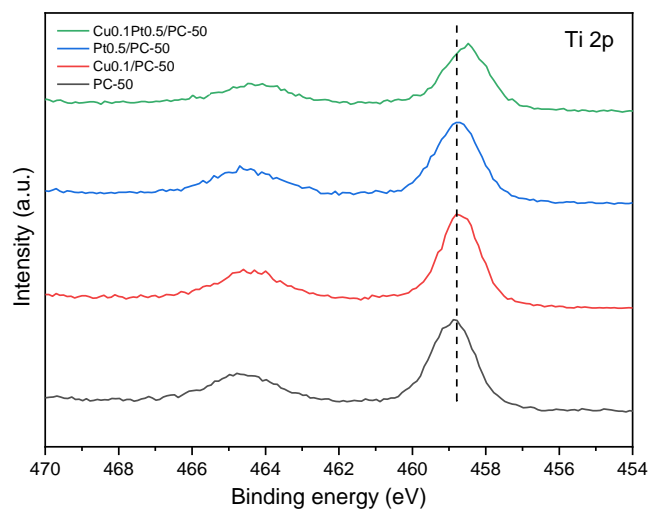

Figure S2. Ti 2p XPS spectra of Cu<sub>0.1</sub>Pt<sub>0.5</sub>/PC-50, Pt<sub>0.5</sub>/PC-50, Cu<sub>0.1</sub>/PC-50 and PC-50

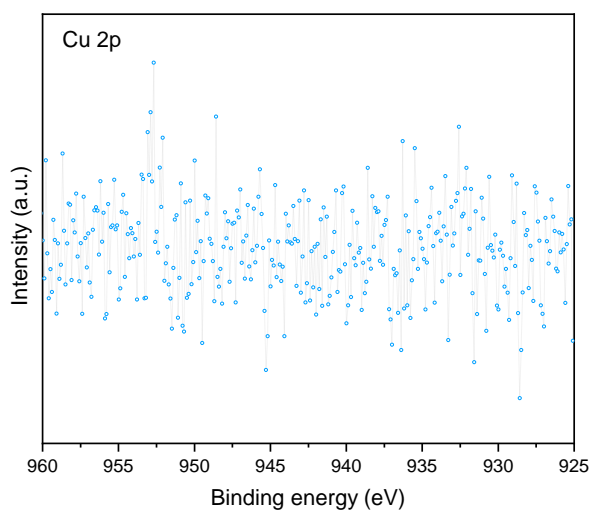

Figure S3. Cu 2p XPS spectra of Cu<sub>0.1</sub>Pt<sub>0.5</sub>/PC-50

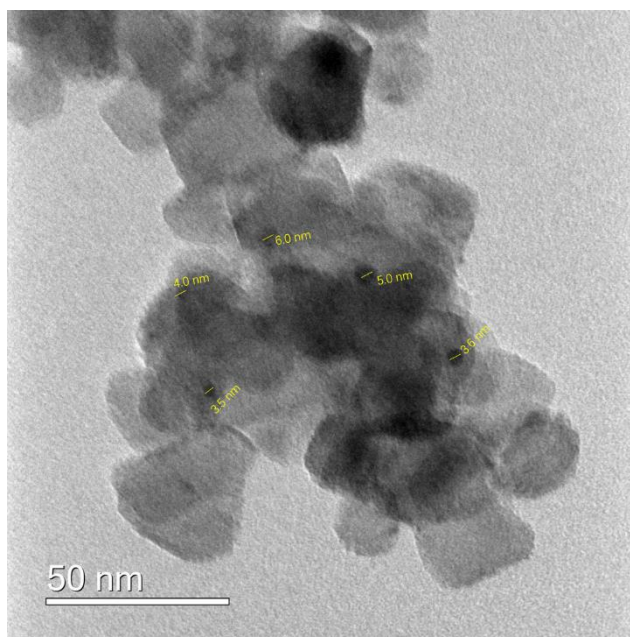

Figure S4. TEM images of  $\text{Cu}_{0.1}\text{Pt}_{0.5}/\text{PC-50}$

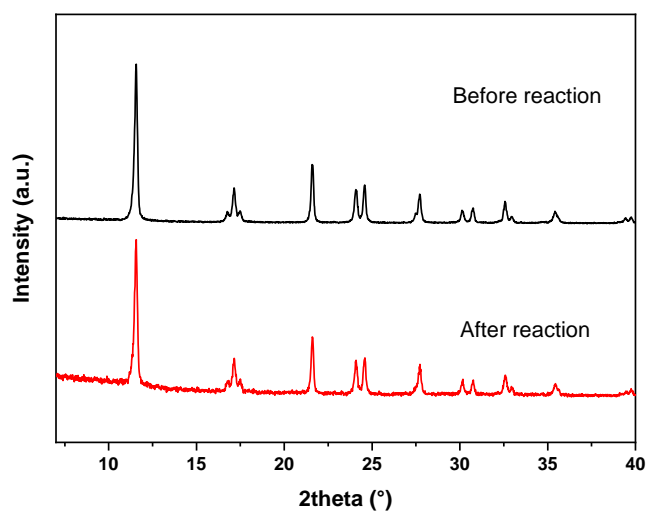

Figure S5. PXRD spectra of  $\text{Cu}_{0.1}\text{Pt}_{0.5}/\text{PC-50}$  before and after reaction



## SUPPORTING INFORMATION

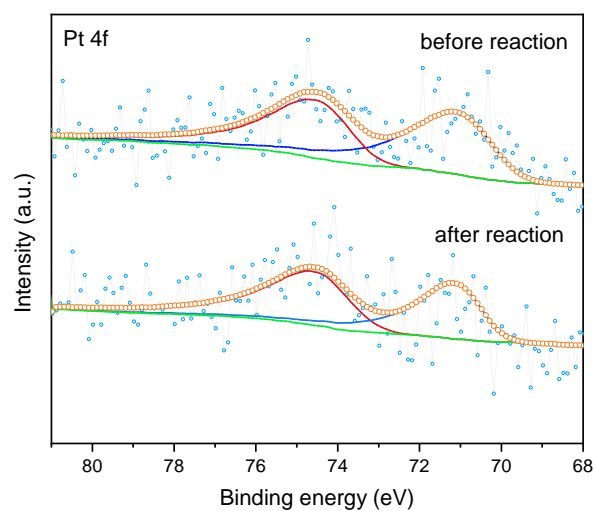

**Figure S6.** Pt 4f XPS spectra of  $\text{Cu}_{0.1}\text{Pt}_{0.5}/\text{PC-50}$  before and after the reaction

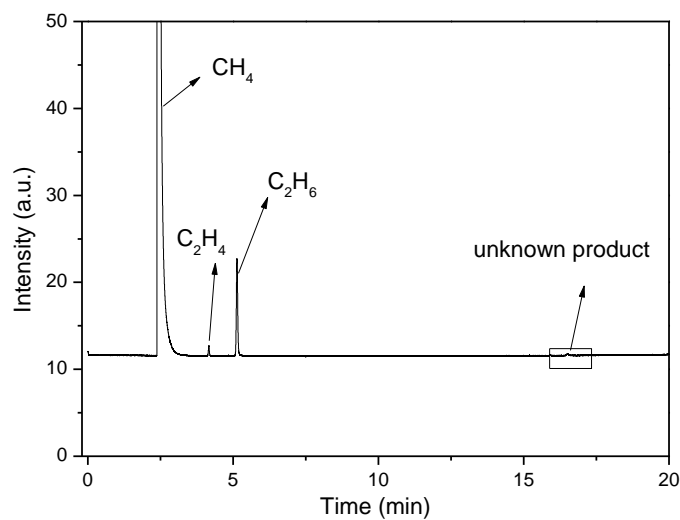

**Figure S7.** The zoom-in of FID spectra during photocatalytic reaction of  $\text{Cu}_{0.1}\text{Pt}_{0.5}/\text{PC-50}$

## SUPPORTING INFORMATION

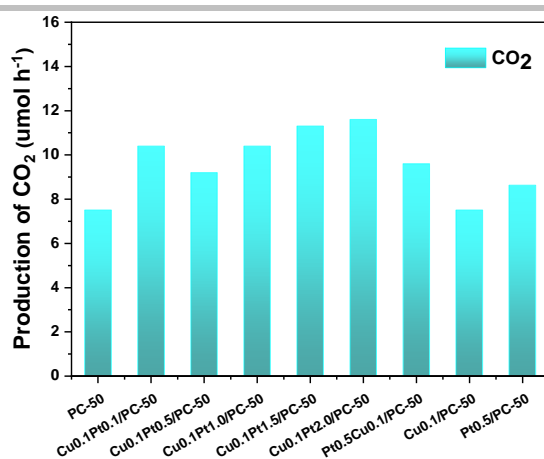

**Figure S8.** CO<sub>2</sub> production over Cu<sub>0.1</sub>Pt<sub>y</sub>/PC-50 ( $y = 0.1, 0.5, 1.0, 1.5, 2.0$  wt%), Cu<sub>0.1</sub>/PC-50, PC-50, Pt<sub>0.5</sub>/PC-50 and Pt<sub>0.5</sub>Cu<sub>0.1</sub>/PC-50; (Reaction condition: O<sub>2</sub> : CH<sub>4</sub> = 1 : 400, GHSV = 2400 h<sup>-1</sup>, 10% of CH<sub>4</sub>, 365 nm LED 40 W, 40 °C)

## Investigation of optimal amount of catalysts

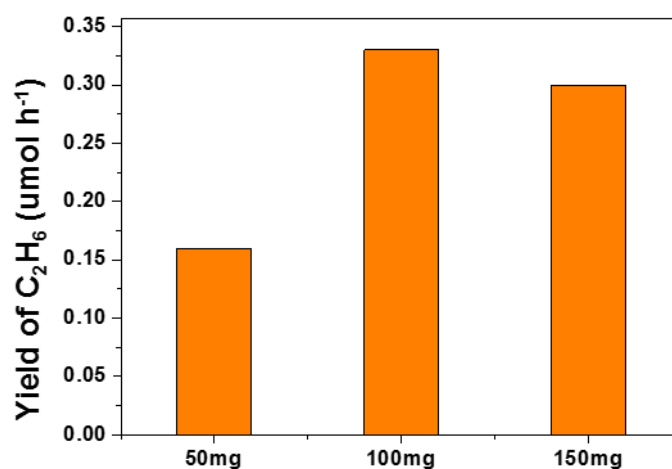

**Figure S9** Photocatalytic OCM process over TiO<sub>2</sub> with different amount of catalysts

(Reaction condition: O<sub>2</sub> : CH<sub>4</sub> = 1 : 4000, 1% CH<sub>4</sub>, total flow rate 50 mL min<sup>-1</sup>, 365 nm LED 20 W, 30 °C)

TiO<sub>2</sub> without modification was selected as a model catalyst to investigate optimal amount of catalysts for our photocatalytic OCM system, as shown in this Figure

The yield of C<sub>2</sub>H<sub>6</sub> remained unchanged after the amount increasing from 50 mg to 100 mg (linear correlation), while it decreased after further increasing to 150 mg. This decrease might be due to light scattering by extra TiO<sub>2</sub>.

**Control experiments**Table S1. Control experimental results of the photocatalytic OCM over Cu<sub>0.1</sub>Pt<sub>0.5</sub>/PC-50

| Order | CH <sub>4</sub> | LED | Products |
|-------|-----------------|-----|----------|
| 1     | x               | √   | x        |
| 2     | √               | x   | x        |

## SUPPORTING INFORMATION

## Comparison of the performance of photocatalytic methane conversion

Table S2. Representative works on photocatalytic methane conversion to ethane/ethane at room temperature and atmospheric pressure

| Samples                                                            | Reaction type                     | Reactor type  | Conditions                                                                                                                                                             | Yield rate of C <sub>2</sub> H <sub>4</sub> and C <sub>2</sub> H <sub>6</sub> | References |
|--------------------------------------------------------------------|-----------------------------------|---------------|------------------------------------------------------------------------------------------------------------------------------------------------------------------------|-------------------------------------------------------------------------------|------------|
| Cu <sub>0.1</sub> Pt <sub>0.5</sub> /PC-50                         | OCM                               | Flow reactor  | Room temperature; 40 W 365 nm LED; 0.1 g catalyst; O <sub>2</sub> : CH <sub>4</sub> = 1 : 400, GHSV = 24000 g <sup>-1</sup> h <sup>-1</sup> , 10% of CH <sub>4</sub> ; | 6.8 μmol h <sup>-1</sup>                                                      | This work  |
| ZrO <sub>2</sub> /SiO <sub>2</sub> (0.1)                           | NOCM                              | Batch reactor | 310 K; Reaction time 3 h; 0.5 g catalyst; 200 μmol CH <sub>4</sub>                                                                                                     | 0.0365 μmol h <sup>-1</sup>                                                   | [1]        |
| MgO                                                                | Methane oxidation                 | Batch reactor | 293 K; High pressure mercury lamp; Reaction time 3 h; 399.9 Pa N <sub>2</sub> O; 4.2 μmol CH <sub>4</sub>                                                              | 0.00268 μmol h <sup>-1</sup>                                                  | [2]        |
| MgO/SiO <sub>2</sub> (2.0)                                         | NOCM                              | Batch reactor | 310 K; 300 W Xe lamp; Reaction time 3 h; 0.2 g catalyst; 200 μmol CH <sub>4</sub>                                                                                      | 0.0092 μmol h <sup>-1</sup>                                                   | [3]        |
| Au/ZnO nanosheets                                                  | NOCM                              | Batch reactor | Ambient temperature; 300 W Xe lamp; Reaction time 4 h; 0.001 g catalyst; 22.3 μmol CH <sub>4</sub>                                                                     | 0.0113 μmol h <sup>-1</sup>                                                   | [4]        |
| 0.5%Pt/TiO <sub>2</sub>                                            | Methane oxidation                 | Batch reactor | 298 K; Philips UV lamps (TUV 4W/G4 T5); Reaction time 6 h; 0.075 g catalyst; 80 mL CH <sub>4</sub>                                                                     | 2.08 μmol h <sup>-1</sup>                                                     | [5]        |
| Ga <sub>2</sub> O <sub>3</sub> -K                                  | NOCM                              | Batch reactor | Room temperature; 300 W Xe lamp; Reaction time 3 h; 0.2 g catalyst; 200 μmol CH <sub>4</sub>                                                                           | 0.054 μmol h <sup>-1</sup>                                                    | [6]        |
| SiO <sub>2</sub> -Al <sub>2</sub> O <sub>3</sub> -TiO <sub>2</sub> | NOCM                              | Batch reactor | Room temperature; 250 W Xe lamp; Reaction time 3 h; 1.0 g catalyst; 200 μmol CH <sub>4</sub>                                                                           | 0.74 μmol h <sup>-1</sup>                                                     | [7]        |
| (Zn <sup>+</sup> , Zn <sup>2+</sup> )-ZSM-5                        | NOCM                              | Batch reactor | 303 K; 150 W high-pressure Hg lamp; Reaction time 8 h; 1.0 g catalyst; 200 μmol CH <sub>4</sub>                                                                        | 2.988 μmol h <sup>-1</sup>                                                    | [8]        |
| Pt/Ga-TiO <sub>2</sub> -SiO <sub>2</sub>                           | NOCM                              | Batch reactor | 333 K; 300 W Xe lamp; Reaction time 4 h; 0.2 g catalyst; 44.6 μmol CH <sub>4</sub>                                                                                     | 0.314 μmol h <sup>-1</sup>                                                    | [9]        |
| Ce(0.5)/Al <sub>2</sub> O <sub>3</sub>                             | NOCM                              | Batch reactor | 310 K; 300 W Xe lamp; Reaction time 3 h; 0.2 g catalyst; 200 μmol CH <sub>4</sub>                                                                                      | 0.1178 μmol h <sup>-1</sup>                                                   | [10]       |
| FSM-16                                                             | NOCM                              | Batch reactor | 310 K; 300 W Xe lamp; Reaction time 3 h; 0.2 g catalyst; 200 μmol CH <sub>4</sub>                                                                                      | 0.018 μmol h <sup>-1</sup>                                                    | [11]       |
| Ga-ETS-10-0.2                                                      | NOCM                              | Batch reactor | 303 K; 150 W high-pressure Hg lamp; Reaction time 5 h; 0.2 g catalyst; 200 μmol CH <sub>4</sub>                                                                        | 2.3 μmol h <sup>-1</sup>                                                      | [12]       |
| 1.5%Pd/TiO <sub>2</sub>                                            | Methane oxidation                 | Batch reactor | 298 K; Philips UV lamps (254 nm, TUV 4W/G4 T5); Reaction time 6 h; 0.075 g catalyst; 80 mL CH <sub>4</sub>                                                             | 2.13 μmol h <sup>-1</sup>                                                     | [13]       |
| Ag-HPW/TiO <sub>2</sub>                                            | Photochemical coupling of methane | Batch reactor | Ambient temperature; 400 W Xe lamp; Reaction time 7 h; 0.1 g catalyst; 0.3 MPa CH <sub>4</sub>                                                                         | 2.3 μmol h <sup>-1</sup>                                                      | [14]       |

## References

- [1] H. Yoshida, M. G. Chaskar, Y. Kato, T. Hattori, *Chem. Commun.* **2002**, 2, 2014–2015.
- [2] C. Yun, M. Anpo, Y. Mizokoshi, Y. Kubokawa, *Chem. Lett.* **1980**, 9, 799–802.
- [3] L. Yuliati, T. Hattori, H. Yoshida, *Phys. Chem. Chem. Phys.* **2005**, 7, 195.
- [4] L. Meng, Z. Chen, Z. Ma, S. He, Y. Hou, H.-H. H. Li, R. Yuan, X.-H. H. Huang, et al., *Energy Environ. Sci.* **2018**, 11, 294–298.
- [5] L. Yu, Y. Shao, D. Li, *Appl. Catal. B Environ.* **2017**, 204, 216–223.
- [6] L. Yuliati, T. Hattori, H. Itoh, H. Yoshida, *J. Catal.* **2008**, 257, 396–402.
- [7] H. Yoshida, N. Matsushita, Y. Kato, T. Hattori, *J. Phys. Chem. B* **2003**, 107, 8355–8362.
- [8] L. Li, G.-D. Li, C. Yan, X.-Y. Mu, X.-L. Pan, X.-X. Zou, K.-X. Wang, J.-S. Chen, *Angew. Chemie Int. Ed.* **2011**, 50, 8299–8303.
- [9] S. Wu, X. Tan, J. Lei, H. Chen, L. Wang, J. Zhang, *J. Am. Chem. Soc.* **2019**, 141, 6592–6600.
- [10] L. Yuliati, T. Hamajima, T. Hattori, H. Yoshida, *J. Phys. Chem. C* **2008**, 112, 7223–7232.
- [11] L. Yuliati, M. Tsubota, A. Satsuma, H. Itoh, H. Yoshida, *J. Catal.* **2006**, 238, 214–220.
- [12] L. Li, Y.-Y. Cai, G.-D. Li, X.-Y. Mu, K.-X. Wang, J.-S. Chen, *Angew. Chemie Int. Ed.* **2012**, 51, 4702–4706.
- [13] L. Yu, D. Li, *Catal. Sci. Technol.* **2017**, 7, 635–640.
- [14] X. Yu, V. L. Zholobenko, S. Moldovan, D. Hu, D. Wu, V. V. Ordonsky, A. Y. Khodakov, *Nat. Energy* **2020**, DOI 10.1038/s41560-020-0616-7.
